# Supplementary material for: Modeling of Sandia Flame D with the non-adiabatic chemistry tabulation approach: the effects of different laminar flames on NOX prediction
Source: Royal Society of Chemistry journal article supplement (doi:10.1039/d2ra06075b), 2023-01-01
Supplement: d2ra06075b1.pdf [file d2ra06075b1.pdf]

## Supporting Information

for

### Modeling of Sandia Flame D with the non-adiabatic chemistry tabulation approach: the effects of different laminar flames on NO<sub>x</sub> prediction

Chuanfeng Yue<sup>1,2</sup>, Jingbo Wang<sup>1,2,\*</sup>, Xiangyuan Li<sup>1,2</sup>

<sup>1</sup>College of Chemical Engineering, Sichuan University, Chengdu, 610065, P. R. China

<sup>2</sup>Engineering Research Center of Combustion and Cooling for Aerospace Power,  
Ministry of Education, Sichuan University, Chengdu, 610065, P. R. China

### Contents

**Figure S1.** The temperature (left) and NO (right) profiles on the central axis with the UP library. Red line marks k- $\epsilon$  result, green line marks k- $\omega$ -SST result. Black dots mark experimental values.

**Figure S2.** (a) Relative error of  $Y_{NO}$  on the central axis; (b) Relative error of maximum  $Y_{NO}$  in radial profiles at six axial locations. The green square represents the CD library, the red square represents the UP library.

**Table S1.** Relative error of maximum NO mass fraction ( $Y_{NO}$ ) in radial profiles at six axial locations.

---

\*Email: wangjingbo@scu.edu.cn

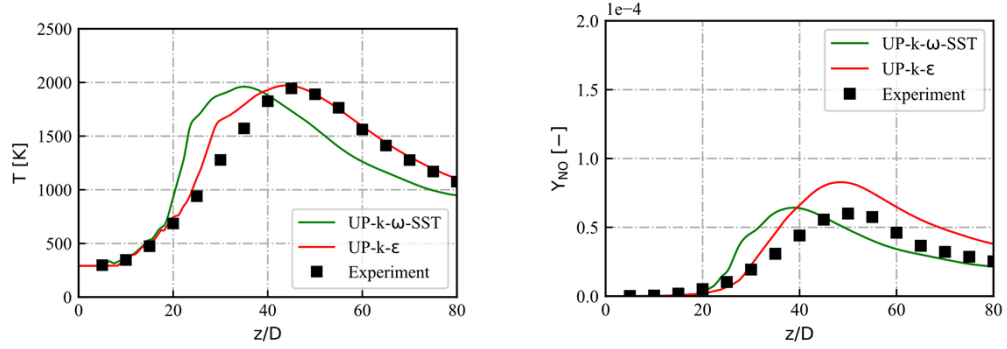

**Figure S1.** The temperature (left) and NO (right) profiles on the central axis with the UP library. Red line marks k- $\epsilon$  result, green line marks k- $\omega$ -SST result. Black dots mark experimental values.

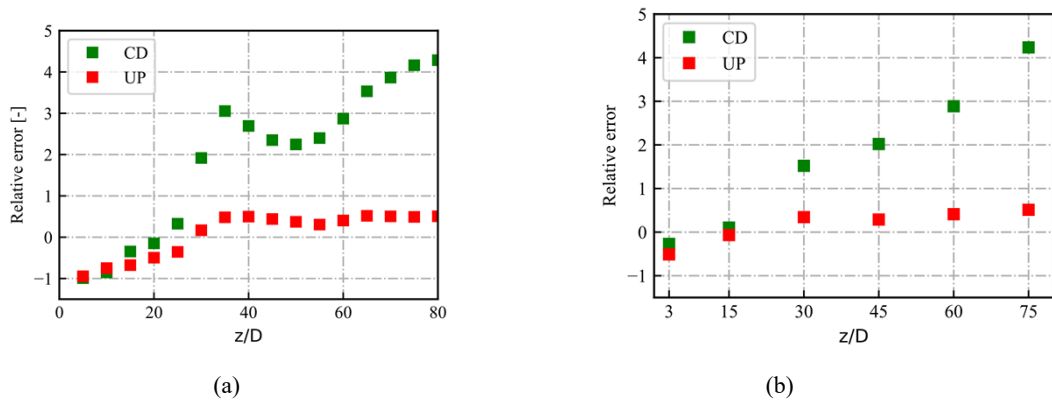

**Figure S2.** (a) Relative error of  $Y_{NO}$  on the central axis; (b) Relative error of maximum  $Y_{NO}$  in radial profiles at six axial locations. The green square represents the CD library, the red square represents the UP library.

**Table S1.** Relative error of maximum NO mass fraction ( $Y_{NO}$ ) in radial profiles at six axial locations.

| $z/D$ | $r/D$ for $\max(Y_{NO})$ | UP-relative error | CD-relative error |
|-------|--------------------------|-------------------|-------------------|
| 3     | 0.79                     | -51%              | -27%              |
| 15    | 1.11                     | -7%               | 10%               |
| 30    | 1.67                     | 34%               | 152%              |
| 45    | 1.11                     | 29%               | 202%              |
| 60    | 0                        | 41%               | 289%              |
| 75    | 0                        | 51%               | 424%              |
